# Supplementary material
Source: Elsevier journal article supplement (https://hal.science/hal-04370462v1/file/mmc2.pdf)
Supplement: mmc2 [file mmc2.pdf]

Comparison of Fibrin Monomers and D-dimers to predict thrombotic events in critically ill patients with COVID-19 pneumonia: a retrospective study.

Alexandre Godon, Zoé Durand, Lydiane Agier, Thomas Lecompte, François Mullier, Raphaël Marlu, Emmanuel de Maistre, Charles Tacquard, Jerrold H. Levy, Anne Godier, Sophie Susen, Pierre Albaladejo

### **Supplementary data**

**Figure S1.** Prophylactic anticoagulation regimens. Patients were censored if a thrombotic event, intensive care unit discharge, or death occurred, whichever the first.

**Supplementary table 1.** Distribution of fibrin monomers and D-dimers plasma level in ECMO patients versus non ECMO patients.

**Supplementary table 2.** Odds of developing thrombotic events based on fibrin monomers and D-dimers plasma level.

**Supplementary table 1**

Distribution of fibrin monomers and D-dimers plasma level in ECMO patients versus non ECMO patients.

|                                     | Day 0                    | Day 2                    | Day 5                    | Day 8                    | Day 11                    | Day 14                   |
|-------------------------------------|--------------------------|--------------------------|--------------------------|--------------------------|---------------------------|--------------------------|
| <b>Fibrin Monomers</b>              |                          |                          |                          |                          |                           |                          |
| ECMO (n=19),<br>median (IQR)        | 7000<br>(5000-<br>46300) | 5350<br>(5000-<br>37225) | 5000<br>(5000-<br>8995)  | 6900<br>(5000-<br>19510) | 9500<br>(5000-<br>50540)  | 5000<br>(5000-<br>7925)  |
| No ECMO<br>(n=145),<br>median (IQR) | 6000<br>(5000-<br>43420) | 5000<br>(5000-<br>32755) | 5000<br>(5000-<br>50500) | 5000<br>(5000-<br>9673)  | 5000<br>(5000-<br>5750)   | 6600<br>(5000-<br>14225) |
| p-value                             | 0.9339                   | 0.9479                   | 0.3630                   | 0.6455                   | 0.4403                    | 0.4387                   |
| <b>D-dimers</b>                     |                          |                          |                          |                          |                           |                          |
| ECMO (n=19),<br>median (IQR)        | 1600<br>(935-<br>5145)   | 4640<br>(1348-<br>16518) | 3580<br>(2197-<br>10454) | 7646<br>(5677-<br>19049) | 11175<br>(4342-<br>19750) | 3861<br>(3205-<br>13005) |
| No ECMO<br>(n=145),<br>median (IQR) | 2004<br>(1200-<br>5000)  | 1580<br>(1021-<br>7191)  | 2100<br>(1390-<br>5212)  | 2705<br>(1640-<br>8633)  | 2700<br>(1665-<br>3890)   | 2780<br>(1477-<br>6940)  |
| p-value                             | 0.6258                   | 0.3688                   | 0.1000                   | 0.0928                   | <b>0.0008</b>             | 0.1049                   |

**Supplementary table 2**

Odds of developing thrombotic events based on fibrin monomers and D-dimers plasma level. Fibrin monomers and D-dimers values are log-transformed to approach a normal distribution. Odds after day 5 are not shown because the majority of thrombotic events (37/46) occurred before day 8.

|                        | Day 0 |           |             | Day 2 |            |                  | Day 5 |           |             |
|------------------------|-------|-----------|-------------|-------|------------|------------------|-------|-----------|-------------|
|                        | OR    | 95%CI     | p           | OR    | 95%CI      | p                | OR    | 95%CI     | p           |
| <b>Fibrin Monomers</b> |       |           |             |       |            |                  |       |           |             |
| All thrombotic events  | 1.30  | 0.92-1.83 | 0.13        | 2.03  | 1.06-3.9   | <b>0.03</b>      | 0.88  | 0.45-1.74 | 0.71        |
| VTE and ATE only       | 2.82  | 1.18-6.94 | <b>0.02</b> | 4.44  | 0.71-29.03 | 0.09             | 1.87  | 0.41-7.64 | 0.38        |
| <b>D-dimers</b>        |       |           |             |       |            |                  |       |           |             |
| All thrombotic events  | 1.64  | 1.15-2.32 | <b>0.01</b> | 2.24  | 1.4-3.57   | <b>&lt;0.001</b> | 1.83  | 1.16-2.9  | <b>0.01</b> |
| VTE and ATE only       | 3.63  | 1.46-9.84 | <b>0.01</b> | 4.26  | 0.99-23.55 | 0.06             | 2.53  | 1.11-5.04 | <b>0.02</b> |

OR: odds ratio. CI: confidence interval. VTE: venous thromboembolism. ATE: arterial thrombotic events.
